# Supplementary material for: Knowledge Sharing Practice and Its Associated Factors Among Healthcare Providers at University of Gondar Comprehensive Specialized Hospital, North West Ethiopian: Cross-sectional Study
Source: Research Square preprint supplement (doi:10.21203/rs.3.rs-407759/v1), 2021-04-12
Supplement: Supplementary file 1 [file af04d4e54d38bd51f1306ca8.docx]

Appendix A: ICT and communication channels for knowledge sharing practice at UoG comprehensive specialized hospital.

| Information communication technology | | Strongly disagreed | Disagree | Neutral | Agree | Strongly agree |
| --- | --- | --- | --- | --- | --- | --- |
| ICT infrastructure (internet, intranet) in the hospital | Frequency | 66 | 58 | 72 | 123 | 104 |
| Percent | 15.60 | 13.71 | 17.02 | 29.08 | 24.59 |
| Technical support $ maintenance for ICT | Frequency | 87 | 74 | 65 | 131 | 66 |
| Percent | 20.57 | 17.49 | 15.37 | 30.97 | 15.60 |
| Training for ICT system | Frequency | 95 | 80 | 78 | 107 | 63 |
| Percent | 22.46 | 18.91 | 18.44 | 25.30 | 14.89 |
| I have e-mail for communicating with my colleagues | Frequency | 74 | 72 | 103 | 101 | 73 |
| Percent | 17.49 | 17.02 | 24.35 | 23.88 | 17.26 |
| Electronic storage (such as a database) to access knowledge | Frequency | 118 | 117 | 98 | 60 | 30 |
| Percent | 27.90 | 27.66 | 23.17 | 14.18 | 7.09 |
| Communication channels | | | | | | |
| Face to face communication | Frequency | 51 | 19 | 30 | 179 | 144 |
| Percent | 12.06 | 4.49 | 7.09 | 42.32 | 34.04 |
| Mobile phone(conversion, SMS) | Frequency | 36 | 54 | 93 | 128 | 112 |
| Percent | 8.51 | 12.77 | 21.99 | 30.26 | 26.48 |
| communication through internet access | Frequency | 34 | 45 | 64 | 172 | 108 |
| Percent | 8.04 | 10.64 | 15.13 | 40.66 | 25.53 |
| Communication through email | Frequency | 96 | 66 | 66 | 136 | 59 |
| Percent | 22.70 | 15.60 | 15.60 | 32.15 | 13.95 |
| Manual and medical record system | Frequency | 46 | 35 | 38 | 175 | 129 |
| Percent | 10.87 | 8.27 | 8.98 | 41.37 | 30.50 |
